# Supplementary material for: Rapid odor processing by layer 2 subcircuits in lateral entorhinal cortex
Source: eLife. 2022 Feb 7;11:e75065. doi: 10.7554/eLife.75065 (PMC8860446; doi:10.7554/eLife.75065)
Supplement: Figure 5—figure supplement 1—source data 1. [file elife-75065-fig5-figsupp1-data1.xls]

## Sheet: Suppl.Fig.5C_LOT_PPF
Cell_pairs	Fan_Pair_EPSC	Pyr_Pair_EPSC	Fan_PPR	Pyr_PPR
d181108	313.9	19.1	2.44	1.63
b181113	155.6	14.2	2.76	2.41
c181113	200.4	37.8	1.38	1.4
b181127	67.2	34.1
d181127	143.3	38.9	1.31	0.61
e181127	50.8	6.9
h181127	25.8	5.3	1.31	1.3
b181108			2.34	3.42
c181108			1.79	1.87

## Sheet: Suppl.Fig.5e_minimalEPSC
Fan_Cell	Fan_min_epsc			Pyr_Cell	Pyr_min_epsc
a190107	9.6			a190109	6.1
b190103	9.3			b190107	5.3
b190109	12			c190109	5.7
d190131	18.1			d190107	7.9
e190103	4.3			d190109	14.5
e190109	6.05			f190107	9
g190107	8.7			g190131	9.2
				h190107	5.7
